# Supplementary material for: Inhibition of hydrogen uptake in Escherichia coli by expressing the hydrogenase from the cyanobacterium Synechocystis sp. PCC 6803
Source: PubMed Central journal article supplement (PMC1904212; doi:10.1186/1472-6750-7-25), 2007-05-23
Supplement: 1472-6750-7-25-S1.pdf [file 1472-6750-7-25-S1.pdf]

## Microarray analysis of TG1/pBS(Kan)Synhox vs. TG1/pBS(Kan)

### Objectives

To investigate whether:

1. there is a difference in metabolic activity upon expressing Synhox by using *E. coli* TG1/pBS(Kan)Synhox and TG1/pBS(Kan) when both strains produce hydrogen [*E. coli* TG1/pBS(Kan)Synhox produces 3-fold more hydrogen than TG1/pBS(Kan)]
2. cloning of the cyanobacterium *hoxEFUYH* merely increases hydrogen production by up-regulating the native *E. coli* hydrogenase system

### Conclusions

1. Gene expression for the *hya*, *hyb*, *hyc*, and *hyp* operons was not altered significantly between TG1/pBS(Kan)Synhox and TG1/pBS(Kan); namely, functional HoxEFUYH is necessary for enhanced hydrogen production in *E. coli*.
2. Using a cut-off ratio of 5.3 (roughly the standard deviation for all the genes), 33 genes were induced and 17 were repressed that are related to other aspects of cell metabolism.

### Strains

1. *E. coli* TG1/pBS(Kan)Synhox
2. *E. coli* TG1/pBS(Kan)

### Procedures

1. Single colonies from one day-old streaked cultures were used to inoculate complex medium (without glucose but with fructose) and allowed to incubate aerobically at 37 °C overnight for the two strains.
2. The aerobic overnight cultures, fresh medium (including 5 mM IPTG), and sealed crimp-top vials (27 mL) were sparged for 5 min with nitrogen, and then 19 mL of fresh medium and the overnight culture (1 mL, sparged) were mixed into sealed crimp-top vials in a glove box.
3. These vials were anaerobically incubated at 37 °C for 6 hour. After 6 hour, these cultures were used for isolation of total DNA. Cell cultures (1.8 mL) were collected into chilled bead beater vials using a syringe.

**Table 1.** Induced genes for TG1/pBS(Kan)Synhox vs. TG1/pBS(Kan).

| Gene name                                                 | b-#   | Signal  | Detection | Fold change | Base line signal | Base line detection | Gene function                                                                |
|-----------------------------------------------------------|-------|---------|-----------|-------------|------------------|---------------------|------------------------------------------------------------------------------|
| <b>Amino acid catabolism genes (tryptophan)</b>           |       |         |           |             |                  |                     |                                                                              |
| <i>tnaL</i>                                               | b3707 | 13938.7 | P         | 24.3        | 549.7            | P                   | tryptophanase leader peptide                                                 |
| <i>tnaA</i>                                               | b3708 | 3354.3  | P         | 13.9        | 244.7            | P                   | subunit of L-cysteine desulfhydrase / tryptophanase                          |
| <b>Amino acid catabolism genes (threonine catabolism)</b> |       |         |           |             |                  |                     |                                                                              |
| <i>tdcB</i>                                               | b3117 | 1611.8  | P         | 9.8         | 195.1            | P                   | subunit of threonine dehydratase (catabolic)                                 |
| <i>tdcC</i>                                               | b3116 | 1591.3  | P         | 8.6         | 182.4            | P                   | TdcC threonine STP transporter                                               |
| <i>tdcD</i>                                               | b3115 | 1278.8  | P         | 8.0         | 202.6            | P                   | propionate kinase / acetate kinase C                                         |
| <i>tdcE</i>                                               | b3114 | 2218.4  | P         | 6.5         | 351.3            | P                   | 2-ketobutyrate formate-lyase / pyruvate formate-lyase 4                      |
| <b>Prophage genes and phage related function genes</b>    |       |         |           |             |                  |                     |                                                                              |
| <i>ydfX</i>                                               | b1568 | 193.2   | P         | 34.3        | 6.4              | A                   | hypothetical protein                                                         |
| <i>pspA</i>                                               | b1304 | 4034.6  | P         | 9.2         | 589              | P                   | regulatory protein for the phage shock protein operon                        |
| <i>pspB</i>                                               | b1305 | 6335    | P         | 8.0         | 753.8            | P                   | stimulates PspC-mediated transcriptional activation of the <i>psp</i> operon |
| <i>pspC</i>                                               | b1306 | 1971.6  | P         | 5.7         | 380.6            | P                   | PspC transcriptional regulator                                               |
| <i>nmpC</i>                                               | b0553 | 1154.1  | P         | 6.1         | 208.5            | P                   | outer membrane porin protein                                                 |
| <b>Energy production/transport (electron donor) genes</b> |       |         |           |             |                  |                     |                                                                              |
| <i>sdhC</i>                                               | b0721 | 1438.1  | P         | 10.6        | 154              | P                   | succinate dehydrogenase membrane protein                                     |
| <i>sdhD</i>                                               | b0722 | 2005.7  | P         | 9.2         | 186.9            | P                   | succinate dehydrogenase membrane protein                                     |
| <b>Energy metabolism (TCA cycle) genes</b>                |       |         |           |             |                  |                     |                                                                              |
| <i>gltA</i>                                               | b0720 | 2226.6  | P         | 8.0         | 335              | P                   | subunit of citrate synthase                                                  |
| <i>mdh</i>                                                | b3236 | 2383.6  | P         | 5.7         | 424.7            | P                   | subunit of malate dehydrogenase                                              |
| <i>sucC</i>                                               | b0728 | 2869.6  | P         | 5.3         | 454.7            | P                   | succinyl-CoA synthetase, $\beta$ subunit                                     |
| <b>Phosphotransferase System genes</b>                    |       |         |           |             |                  |                     |                                                                              |
| <i>treB</i>                                               | b4240 | 2321.8  | P         | 9.2         | 380.3            | P                   | subunit of EIITre                                                            |

|                                                 |       |         |   |     |        |   |                                            |
|-------------------------------------------------|-------|---------|---|-----|--------|---|--------------------------------------------|
| <i>treC</i>                                     | b4239 | 1181.6  | P | 6.1 | 174.2  | M | trehalose-6-phosphate hydrolase            |
| <i>gatA</i>                                     | b2094 | 14585.4 | P | 6.1 | 2506.2 | P | subunit of EIIGat                          |
| <i>gatB</i>                                     | b2093 | 8325.5  | P | 7.5 | 1325.5 | P | subunit of EIIGat                          |
| <b>Transporter genes</b>                        |       |         |   |     |        |   |                                            |
| <i>glpT</i>                                     | b2240 | 4895.1  | P | 6.5 | 767.6  | P | glycerol-3-P MFS transporter               |
| <i>yhaM</i>                                     | b3108 | 2518.2  | P | 5.3 | 727.3  | P | hypothetical ORF                           |
| <i>yhaN</i>                                     | b3109 | 5431.5  | P | 8.6 | 605.3  | P | hypothetical ORF                           |
| <i>yhaO</i>                                     | b3110 | 3790.1  | P | 9.8 | 411    | P | YhaO STP transporter                       |
| <i>yhaR</i>                                     | b3113 | 1558.9  | P | 5.7 | 277.2  | P | hypothetical ORF                           |
| <b>Adaptations (temperature extremes) genes</b> |       |         |   |     |        |   |                                            |
| <i>ibpB</i>                                     | b3686 | 7293.4  | P | 6.5 | 1220.5 | P | small heat shock protein IbpB              |
| <b>Sulfur metabolism gene</b>                   |       |         |   |     |        |   |                                            |
| <i>ydeN</i>                                     | b1498 | 1434.2  | P | 6.5 | 214.4  | P | putative sulfatase                         |
| <b>Outer membrane protein gene</b>              |       |         |   |     |        |   |                                            |
| <i>yciD</i>                                     | b1256 | 1787.5  | P | 8.0 | 256.3  | P | subunit of Colicin S4 Transport System     |
| <b>tRNA genes</b>                               |       |         |   |     |        |   |                                            |
| <i>valT</i>                                     | b0744 | 17792   | P | 6.1 | 2784.7 | P | tRNA for Val (one of seven valine tRNAs)   |
| <i>valZ</i>                                     | b0746 | 14873.2 | P | 5.7 | 2452.4 | P | tRNA for Val (one of seven valine tRNAs)   |
| <i>valX</i>                                     | b2402 | 14196.8 | P | 5.3 | 2416.2 | P | tRNA for Val (one of seven valine tRNAs)   |
| <i>glyW</i>                                     | b1911 | 4921    | P | 5.3 | 803.5  | P | tRNA for Gly (one of six glycine tRNAs)    |
| <i>glyV</i>                                     | b4163 | 6106.8  | P | 5.3 | 1243.4 | P | tRNA for Gly (one of six glycine tRNAs)    |
| <b>lactose related genes</b>                    |       |         |   |     |        |   |                                            |
| <i>lacY</i>                                     | b0343 | 3409.5  | P | 5.7 | 612.3  | P | LacY lactose MFS transporter               |
| <i>lacA</i>                                     | b0342 | 2377.4  | P | 5.7 | 391.7  | P | subunit of galactoside O-acetyltransferase |

**Table 2.** Repressed genes for TG1/pBS(Kan)Synhox vs. TG1/pBS(Kan)

| Gene name                                                 | b-#   | Signal | Detection | Fold change | Base line signal | Base line detection | Gene function                                       |
|-----------------------------------------------------------|-------|--------|-----------|-------------|------------------|---------------------|-----------------------------------------------------|
| <b>Two component regulatory system gene</b>               |       |        |           |             |                  |                     |                                                     |
| <i>torT</i>                                               | b0994 | 33.5   | A         | -3.0        | 134.4            | P                   | TorT-unknown inducer                                |
| <b>Electrochemical potential driven transporter genes</b> |       |        |           |             |                  |                     |                                                     |
| <i>yicE</i>                                               | b3654 | 36.4   | A         | -5.3        | 248.3            | P                   | YicE NCS2 transporter                               |
| <i>yihP</i>                                               | b3877 | 31.1   | A         | -8.0        | 236.7            | P                   | YihP GPH transporter                                |
| <i>melB</i>                                               | b4120 | 6.5    | A         | -36.8       | 329.6            | P                   | MelB GPH transporter                                |
| <b>Prophage genes and phage related function genes</b>    |       |        |           |             |                  |                     |                                                     |
| <i>yjJT</i>                                               | b2637 | 9.6    | A         | -7.5        | 181.6            | P                   | CP4-57 prophage; predicted protein                  |
| <i>intB</i>                                               | b4271 | 25.5   | A         | -9.2        | 212.8            | P                   | KpLE2 phage-like element; predicted integrase       |
| <b>Transcription related regulation gene</b>              |       |        |           |             |                  |                     |                                                     |
| <i>ydeO</i>                                               | b1499 | 9      | A         | -10.6       | 118.8            | P                   | YdeO transcriptional activator                      |
| <b>ATP proton motive force interconversion gene</b>       |       |        |           |             |                  |                     |                                                     |
| <i>atpC</i>                                               | b3731 | 23.7   | A         | -12.1       | 724.9            | P                   | ATP synthase, F1 complex, ε subunit                 |
| <b>ABC transporter gene</b>                               |       |        |           |             |                  |                     |                                                     |
| <i>yjFF</i>                                               | b4231 | 6.5    | A         | -34.3       | 190.7            | P                   | subunit of YtfQ/YtfR/YtfS/YtfT/YjfF ABC transporter |
| <b>TCA cycle gene</b>                                     |       |        |           |             |                  |                     |                                                     |
| <i>fumB</i>                                               | b4122 | 19     | A         | -14.9       | 397.6            | P                   | subunit of fumarase B                               |
| <b>DNA degradation gene</b>                               |       |        |           |             |                  |                     |                                                     |
| <i>mcrB</i>                                               | b4346 | 8.1    | A         | -32.0       | 229.5            | P                   | MrcB subunit of 5-methylcytosine restriction system |
| <b>Unassigned reversible reaction gene</b>                |       |        |           |             |                  |                     |                                                     |
| <i>sgaE</i>                                               | b4198 | 21.1   | A         | -18.4       | 295.5            | P                   | L-ribulose 5-phosphate 4-epimerase                  |
| <b>Unknown function genes</b>                             |       |        |           |             |                  |                     |                                                     |

|             |       |      |   |       |       |   |                   |
|-------------|-------|------|---|-------|-------|---|-------------------|
| <i>yghG</i> | b2971 | 18.6 | A | -5.3  | 92.7  | P | unknown function  |
| <i>yjhS</i> | b4309 | 12.3 | A | -6.5  | 119.8 | P | conserved protein |
| <i>yjeN</i> | b4157 | 13.8 | A | -8.0  | 163.6 | P | conserved protein |
| <i>yjjJ</i> | b4385 | 15.6 | A | -9.2  | 196.1 | P | conserved protein |
| <i>yigE</i> | b3814 | 15.9 | A | -11.3 | 228.7 | P | conserved protein |

**Table 3.** Gene expression for *E. coli* native hydrogenase 3 and the related proteins (formate hydrogenase H and maturation protein) upon cloning *hoxEFUYH*.

| Gene name   | pBS(Kan) signal | Synhox signal | Fold change | Gene function                                                            |
|-------------|-----------------|---------------|-------------|--------------------------------------------------------------------------|
| <i>hycA</i> | 2538.2          | 1820.7        | -1.3        | Transcriptional repression of hyc and hyp operon                         |
| <i>hycB</i> | 2589.3          | 1658.9        | -1.6        | Probable small subunit of hydrogenase 3                                  |
| <i>hycC</i> | 1099.5          | 1218.6        | 1.2         | Membrane-spanning protein of hydrogenase 3                               |
| <i>hycD</i> | 827.8           | 1193.9        | 1.3         | Membrane-spanning protein of hydrogenase 3                               |
| <i>hycE</i> | 827.8           | 1114.5        | 1.3         | Large subunit of hydrogenase 3                                           |
| <i>hycF</i> | 1844.1          | 2699.4        | 1.4         | Iron-sulfur protein of hydrogenase 3                                     |
| <i>hycG</i> | 895.7           | 1215.8        | 1.4         | Hydrogenase activity                                                     |
| <i>hycH</i> | 894.7           | 1583          | 1.6         | Processing of large subunit (HycE) of hydrogenase 3                      |
| <i>hycI</i> | 1128.4          | 1344          | 1.2         | Protease involved in processing C-terminal end of HycE                   |
| <i>hypA</i> | 2381.9          | 1545.1        | -1.4        | Pleiotrophic effects on 3 hydrogenase isozyme                            |
| <i>hypB</i> | 3698            | 2130.2        | -1.7        | Guanosine-nucleotide binding protein, functions as nickel-donor for HycE |
| <i>hypC</i> | 2569.6          | 2331.4        | -1.3        | Pleiotrophic effects on 3 hydrogenase isozyme                            |
| <i>hypD</i> | 2763.7          | 2032.8        | -1.4        | Pleiotrophic effects on 3 hydrogenase isozyme                            |
| <i>hypE</i> | 1297            | 1176.8        | 1           | Plays structural role in maturation of all 3 hydrogenase                 |
| <i>hypF</i> | 389.6           | 521.7         | 1           | Transcriptional regulatory protein                                       |
| <i>fhlA</i> | 493.9           | 715.1         | 1.3         | Transcriptional activator for fdhF, hyc and hyp operon                   |
| <i>fdhF</i> | 2346.7          | 1193.9        | -1.7        | Selenopolypeptide subunit of formate dehydrogenase H                     |

**Table 4.** Gene expression for *E. coli* native hydrogenase 1 and hydrogenase 2 upon cloning *hoxEFUYH*.

| Gene name   | pBS(Kan) signal | Synhox signal | Fold change | Gene function                                                                         |
|-------------|-----------------|---------------|-------------|---------------------------------------------------------------------------------------|
| <i>hyaA</i> | 5877.9          | 5768          | 1.1         | Small subunit of hydrogenase 1                                                        |
| <i>hyaB</i> | 3413.7          | 3011.6        | -1.1        | Large subunit of hydrogenase 1                                                        |
| <i>hyaC</i> | 3199.5          | 2781.5        | -1.1        | Probable Ni/Fe-hydrogenase 1 b-type cytochrome subunit                                |
| <i>hyaD</i> | 2942            | 2740.4        | -1.1        | Processing of HyaA and HyaB                                                           |
| <i>hyaE</i> | 1884.8          | 1701.3        | -1.1        | Processing of HyaA and HyaB                                                           |
| <i>hyaF</i> | 908.7           | 1071.7        | 1.3         | Nickel incorporation into hydrogenase 1 protein                                       |
| <i>hybA</i> | 1796            | 2617.8        | 1.4         | hydrogenase 2 4Fe-4S ferredoxin-type component                                        |
| <i>hybB</i> | 557.8           | 870.8         | 1.4         | Probable cytochrome Ni/Fe component of hydrogenase 2                                  |
| <i>hybC</i> | 365.6           | 566.6         | 1.5         | large subunit of hydrogenase 2                                                        |
| <i>hybD</i> | 522.5           | 489.5         | -1.1        | Probable processing element for hydrogenase 2                                         |
| <i>hybE</i> | 513.2           | 617.8         | 1.3         | Member of <i>hyb</i> operon                                                           |
| <i>hybF</i> | 270             | 380.6         | 1.3         | may modulate levels of hydrogenase 2                                                  |
| <i>hybG</i> | 708.6           | 663.7         | 1           | Hydrogenase 2 operon protein: may effect maturation of large subunit of hydrogenase 2 |
